# Supplementary material for: Resistant starch intake facilitates weight loss in humans by reshaping the gut microbiota
Source: Springer Nature journal article supplement (doi:10.1038/s42255-024-00988-y), 2024-02-26

# Extended Data Figure 8H

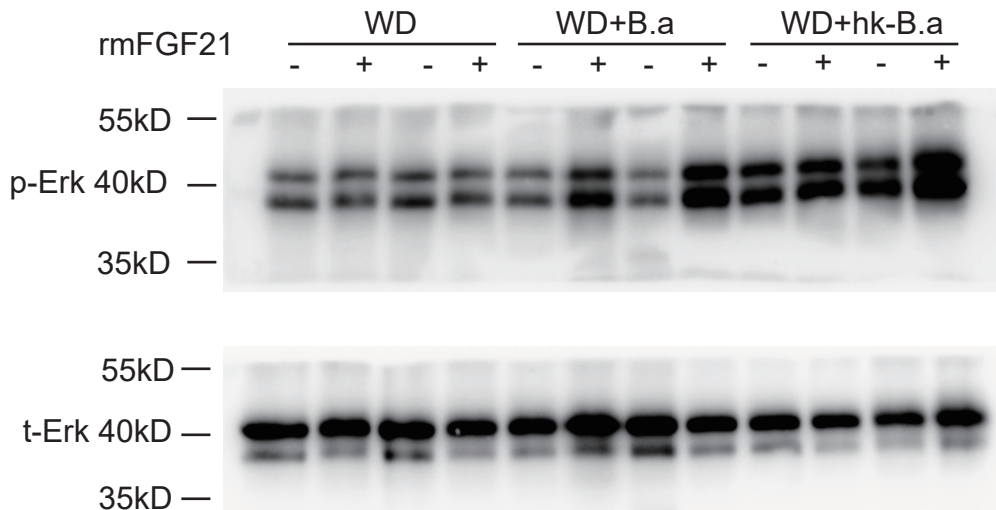

Supplement: 42255_2024_988_MOESM16_ESM.pdf [file 42255_2024_988_MOESM16_ESM.pdf]
